# Supplementary material
Source: PubMed Central journal article supplement (PMC11113172)
Supplement: 18_2014_1619_MOESM1_ESM.pdf [file 18_2014_1619_MOESM1_ESM.pdf]

# SOCS proteins in regulation of receptor tyrosine kinase signaling

Julhash U. Kazi, Nuzhat N. Kabir, Amilcar Flores-Morales and Lars Rönnstrand

## Supplementary materials

**Figure S1:** Mutation in SOCS proteins according to the Cosmic database.

<http://cancer.sanger.ac.uk/cancergenome/projects/cosmic/>

**SOCS1** I T SH TT FF S N M C RE  
MVAHQVAAD NAVSTAAEPR RRPEPSSSS SSPAAPARPR PC<sup>S</sup>PAVPAPAP GDTHFRFRS HADY<sup>N</sup>RRIT<sup>M</sup>TRA SALLDACG<sup>F</sup>Y WGPLSVHGAH  
ERLRAEPVGT FLVRDSRQRN CFFAL<sup>R/N</sup>SVKMA SGPTSIRVHF<sup>K</sup>QAGR<sup>C</sup>FHLDGS RESFDCLFEL LEHYVAAP<sup>H</sup>RLGAPLRQR VRPLQELCRQ  
RIVATVGREN LARIPLN<sup>S</sup>PVL RDYL<sup>S</sup>SSFP<sup>S</sup>FQ I

**SOCS2** MTLRCLPSG NGGEG<sup>A</sup>TRSQW GTAGSAE<sup>D</sup>EPS PQAARLAKAL RELGQTGWYW<sup>G</sup>SMTVNEAKE KLK<sup>D</sup>E<sup>A</sup>PEGTF LIR<sup>N</sup>DSSHSYD<sup>C</sup>LLT<sup>S</sup>ISVK<sup>TSA</sup>  
GPTNL<sup>Q</sup>RIEY<sup>Q</sup>DGKFR<sup>L</sup>LD<sup>S</sup>II CVKSKL<sup>H</sup>Q<sup>F</sup>D SVVHL<sup>N</sup>ID<sup>Y</sup>YV QM<sup>C</sup>CKDKRTGP EAPRNGTVHL YLTKPLY<sup>A</sup>TSA PSLQL<sup>R</sup>HL<sup>C</sup>R<sup>L</sup>LT INKCTGAIWG  
LPL<sup>L</sup>TR<sup>Q</sup>L<sup>D</sup>KDY LE<sup>E</sup>YK<sup>F</sup>QV

**SOCS3** MVTHSKFPAA GMSRPLD<sup>T</sup>SL RLKTFSSKSE YQLVVNAV<sup>N</sup>RK LQES<sup>S</sup>GFYWSA VTG<sup>S</sup>GEANLLL SAEPAGTFLI R<sup>D</sup>SSDQRHFF TLSVKTQSGT  
KNL<sup>C/H/L</sup>RIQCEGG FSLQSD<sup>G</sup>PR<sup>S</sup>TQVPV<sup>H</sup>RFDCV LKLVHHYMP PGAPSFPSPP TEPSSVEPEQ PSAQL<sup>S</sup>PL<sup>S</sup>PGSP PRRAYIYSG GEKIPLVLSR  
PLSSNVATLQ HLCRKT<sup>I</sup>VNGH LDSYEKVTQL PGPIREFLDQ YDAPL  
MAENNENISK NVDVRPKTSR<sup>S</sup>RSADR<sup>S</sup>KD<sup>S</sup>GY VWSG<sup>N</sup>KL<sup>S</sup>WS KKSESYSDAE TVNGIEKTEV SLRNQERKHS CSSIELDLDH SCGHRFLGR<sup>S</sup>  
LKQKLQDAVG QCFFPIKNCSS RHSSGLPSKR<sup>E</sup>KIHISELMLD KCPFP<sup>R</sup>SD<sup>L</sup>AFRWHFIK<sup>R</sup>H<sup>T</sup>APIN<sup>S</sup>K<sup>S</sup>DE WVSTD<sup>L</sup>RS<sup>Q</sup>TE LRDGQL<sup>R</sup>K<sup>R</sup>RN  
MEENINCF<sup>L</sup>FSH TNV<sup>Q</sup>PC<sup>V</sup>IT<sup>T</sup> DNALCR<sup>N</sup>EG<sup>Q</sup>PM TG<sup>F</sup>SV<sup>M</sup>NL<sup>V</sup>SN NSIEDSDMDS DDEILT<sup>C</sup>L<sup>T</sup>S<sup>S</sup> SRKRNKPKWD L<sup>D</sup>DEIL<sup>Y</sup>QLET PKYHTQIDY  
VHCL<sup>A</sup>VP<sup>Q</sup>DLLQ INN<sup>N</sup>PCY<sup>W</sup>GV MDKYAAEALL EGKPEGT<sup>F</sup>LL RDSAQEDY<sup>L</sup>F SVSFR<sup>R</sup>YS<sup>S</sup>RS LHARIEQWNH NFSFDAH<sup>D</sup>PC VFHSPDITGL  
LEHYK<sup>D</sup>PSAC MFFEPLLSTP LIRTFP<sup>F</sup>SLQ HICRTVIC<sup>N</sup>C TTYDGIDALP I<sup>F</sup>SSMKLYL<sup>K</sup>EYHYK<sup>R</sup>K<sup>V</sup>RV LRIDAPEQQC  
MDKVGKMWNN FKYRC<sup>R</sup>QNLFG HEGGSRSENV DM<sup>S</sup>NSR<sup>N</sup>CLSV KEK<sup>S</sup>NI<sup>S</sup>IGDS TPQQSSPLR ENIALQLGLS<sup>N</sup>PK<sup>N</sup>SS<sup>R</sup>RN<sup>Q</sup>NCATE<sup>I</sup>PIQ<sup>V</sup>  
EIS<sup>K</sup>E<sup>K</sup>DN<sup>S</sup>CVTPG<sup>Y</sup>TR<sup>L</sup>AR RDSYSRHAPW<sup>V</sup>GG<sup>W/E/V</sup>KK<sup>H</sup>SC<sup>S</sup>T<sup>N</sup>KT<sup>Q</sup>SS<sup>L</sup>DAD<sup>K</sup>K<sup>F</sup>GRTRSG<sup>L</sup>Q RRER<sup>R</sup>Y<sup>G</sup>V<sup>S</sup>S VHD<sup>M</sup>DSV<sup>S</sup>SR TVGSRSLR<sup>K</sup>QR

**SOCS4** LQDTVGLCFP MRTYSKQSKP LFSNKRKIHL SELML<sup>D</sup>EK<sup>C</sup>PF PAGSDLAQKW HLIKQHTAPV SPHSTFFDTF<sup>S</sup>DP<sup>S</sup>SLVSTED<sup>E</sup>EDRLRERRRL  
SIEEGVDPPP NAQIHTFEAT AQVNPLYKLG PKLAPGMTEI SGDSSAIPQA NCD<sup>S</sup>EEDTTT LCLQSR<sup>R</sup>CK<sup>Q</sup>Q RQISGDSHTH<sup>I</sup>VS<sup>R</sup>QGAWK<sup>V</sup>H  
TQIDIYHCLV PDLLQITGNP CYWGVMDRYE AEALLEGKPE GTFLLRDSAQ EDYLFSVSFR RYNRSLHARI<sup>Q/L</sup>EQWNHNFSD<sup>V</sup>AH<sup>D</sup>PCVFHSS  
TVTGLLE<sup>V</sup>HY<sup>E</sup>K<sup>L</sup>DPS<sup>S</sup>CMFFEP LLT<sup>M</sup>SLNRTF PFSLYQIC<sup>H</sup>RA VICRCTTYDG IDGLPLP<sup>S</sup>ML QDFLKEYHYK QKV<sup>T</sup>RV<sup>W</sup>LER EPV<sup>K</sup>AK  
MKKISL<sup>N</sup>KT<sup>L</sup>R KSFNL<sup>N</sup>KSKE ETDFMVVQ<sup>Q</sup>PLASDFGKDD SLFG<sup>S</sup>CYGKD MASCDINGED EKGK<sup>N</sup>RSK<sup>S</sup>ESLM<sup>V</sup>G<sup>T</sup>L<sup>K</sup>R<sup>R</sup>LSAKQK<sup>S</sup>KG<sup>K</sup>  
AG<sup>T</sup>PSGSSAD EDTFSSSSAP IVFKD<sup>V</sup>RAQR PIRSTSLRSH HYPAPW<sup>L</sup>PLR PTNSEETCIK MEVRV<sup>K</sup>AL<sup>V</sup>H SSSP<sup>S</sup>AL<sup>N</sup>G VR<sup>K</sup>DF<sup>H</sup>DL<sup>Q</sup>S

**SOCS5** ETTCQEANS LKSSASHNGD LHLHLDEHVP VVIGLMP<sup>D</sup>GY IQYTVPLDEG MYPLEGSRYS CLDSSSPMEV<sup>V</sup>AVPPQVGG<sup>R</sup>AFPEDESQVD  
QDLV<sup>T</sup>A<sup>P</sup>E<sup>I</sup>F VDQSV<sup>D</sup>NGLLI GTTGVM<sup>L</sup>QSP R<sup>S</sup>AG<sup>H</sup>D<sup>V</sup>Y PPL SPLPPMQNN QIQ<sup>R</sup>N<sup>F</sup>SGLT GTEA<sup>L</sup>H<sup>V</sup>AESM<sup>H</sup>RCHLN<sup>F</sup>DPNS APG<sup>D</sup>VARV<sup>L</sup>Y<sup>S</sup>  
VQSSGPMVVT SLTEELK<sup>L</sup>A KQG<sup>W</sup>Y<sup>W</sup>GPIT RWEAEGKLAN<sup>V</sup>PD<sup>G</sup>SFLVRD SSDRYLLSL<sup>S</sup>FR<sup>S</sup>HGK<sup>T</sup>LH TRIE<sup>H</sup>SN<sup>G</sup>RF SFYEQPDVEG  
HT<sup>S</sup>IV<sup>D</sup>L<sup>I</sup>EH SIRD<sup>E</sup>NGAF CYSRSLRPGS ATYP<sup>V</sup>RLTNP VSR<sup>F</sup>MQV<sup>R</sup>SL QYL<sup>C</sup>RFVIR<sup>Q</sup>YTRIDLIQKL PLPNK<sup>M</sup>KDY<sup>L</sup>QEKHY  
MVFRNVGRPP EEEDVEAAPE PGPSELLCPR HRCALDPKAL PPGLALERTW GPAAGLEAQL AALGLGQ<sup>P</sup>PAG PGVKT<sup>V</sup>GGGC CPCPCPPQPP  
PPQPQPPAAA PQAGEDPTET SDALLVLEGL ESEAESLETN SCSEEESSP GRGGGGGGRL<sup>M</sup>LQPPGPELP PVPFPLQDLV PLGRLSRGEQ

**SOCS6** QQQQQQPPPP PPPPPGLRPL LAGPSRKG<sup>S</sup>F KIRLSRLFRT KSCN<sup>G</sup>GGSGG DGTGKRPSGE LAASAA<sup>N</sup>SLTD MGGSAGRELD AGRKPKL<sup>T</sup>RT  
QSAFSPVSFS PLFTGETVSL VD<sup>V</sup>DISQRGL TSPHPPTPPP PRRSLSLLD DISGLTPTSV LV<sup>L</sup>PM<sup>P</sup>GS<sup>S</sup>LQ SFPLPPPPPP HAPDAFPRIA  
P<sup>L</sup>IRAAESLHS QPPHLQ<sup>C</sup>PL YRPDSS<sup>S</sup>FAA SL<sup>R</sup>RELEKCGW YWGP<sup>M</sup>NWEDA EMKLGK<sup>P</sup>DPG SFLVRDSSDP<sup>C</sup>RY<sup>I</sup>LSLS<sup>F</sup>RS QGITH<sup>H</sup>TRME  
HYRGT<sup>F</sup>SLWC H<sup>P</sup>K<sup>F</sup>ED<sup>R</sup>CQS VVEFIKRAIM<sup>H</sup>SK<sup>N</sup>G<sup>K</sup>FLYF LRSRV<sup>P</sup>GLPP TPVQLLYPVS RFSNVKSLQH LCRFRIRQLV RIDHI<sup>P</sup>DLPL  
PKPLISYIRK FYYYPQEEV YLSLKEAQLI SKQKQEVEPS T

**SOCS7** MYLEHTSHCP HHDDDTAMDT PLPRRPLLA VERTGQRPLW APSLEL<sup>P</sup>PKV MQ<sup>S</sup>PLPAGAF<sup>L</sup>EEVAEGTPAQ TESEPKVLD<sup>D</sup>PE<sup>D</sup>LLCIAKT  
F<sup>L</sup>SYLRESGWY WGSITASEAR QHLQKMP<sup>E</sup>GT FLVRDSTHPS YLFTLSVKTT RGPTNVRIEY ADSSFR<sup>L</sup>DSN CLSRPRILAF PDVSVLQHY  
VASCTADTRS DSP<sup>Y</sup>DPAPTPA LPMPKEDAPS DPALPAPPPA TAVHLKLVQV FVRR<sup>N</sup>SSARSL QHLCRLVINR LVADVDCLPL PR<sup>R</sup>RMADYLRQ  
YPFQL
